# Supplementary material
Source: publisher figshare collection journal article supplement (https://acs.figshare.com/ndownloader/files/4646014)
Supplement: Supplementary file 1 [file 4646014]

# **Three-Dimensional Through-Space/Through-Bond Delocalization in Cyclophane Systems: A Molecule-In-Molecule approach**

Hsin-Chieh Lin and Bih-Yaw Jin\*

**Supporting Information**

**Monomer Wave Functions,  
Matrix elements (Table)**

## Monomer Wave Functions

The molecular orbitals of the a fragment are written as the linear combination of atomic orbitals (LCAO)

$$\phi_n = \sum_p c_{n,p} \chi_p, \quad (2)$$

where the basis function  $\chi_p$  is taken to be the  $p_z$  atomic orbital on the atom  $p$ . The LCAO coefficients  $c_{n,p}$  are obtained by solving the restricted Hartree-Fock equation, given by

$$\mathbf{F}c_n = E_n c_n, \quad (3)$$

where  $\mathbf{F}$  is the Fock matrix and  $E_n$  is the energy of the  $n$ -th molecular orbital. The matrix element of the Fock matrix for the Pariser-Parr-Pople Hamiltonian is given by

$$\mathbf{F}_{p,p} = \alpha_{p,p} + (1/2)\gamma_{p,p}P_{p,p} - \sum_{q \neq p} (\gamma_{p,q}q_q - P_{q,q}\gamma_{p,q}), \quad (4a)$$

$$\mathbf{F}_{p,q} = \beta_{p,q} - (1/2)\gamma_{p,q}P_{p,q}, \quad (4b)$$

where the core integral  $\alpha_{p,p}$  is the negative value of the valence state ionization potential of the atom  $p$  and the  $\beta_{p,q}$  the resonance integral between the  $p_z$  orbitals on atoms  $p$  and  $q$ . The  $P_{p,q} = 2\sum_n c_{n,p}c_{n,q}$  gives the mobile bond order between atom  $p$  and  $q$  and  $\gamma_{p,q}$  is the electron-electron repulsion integral. The non-nearest-neighbor interactions are taken into account in the PPP model. The  $\alpha_{p,p}$ ,  $\beta_{p,q}$  and  $\gamma_{p,q}$  integrals can be estimated by semiempirical parameterization shown below. The core integral  $\alpha_{p,p}$  can be evaluated by the Slater nuclear charge ( $z_p$ ) and core charges ( $\rho_p$ ) according to the semiempirical expression<sup>1</sup>

$$\alpha_{p,p} = -\exp(0.342z_p + 0.555\rho_p + 0.758) \quad (5)$$

The resonance integral,  $\beta_{p,q}$ , can be evaluated by dividing it into  $\sigma$  and  $\pi$  components, defined as:

$$\beta_{p,q} = \beta_\sigma \theta_{z',p} \theta_{z',q} + \beta_\pi (\theta_{x',p} \theta_{x',q} + \theta_{y',p} \theta_{y',q}) \quad (6a)$$

Here  $(\theta_{x'p}, \theta_{y'p}, \theta_{z'p})$  and  $(\theta_{x'q}, \theta_{y'q}, \theta_{z'q})$  are direction cosine of the  $p_z$  orbitals on atoms  $p$  and  $q$ , with respect to rectangular coordinate system  $(x', y', z')$ . The  $z'$  axis was defined the axis along the line between atoms  $p$  and  $q$ . The semiempirical integrals  $\beta_\pi$  can be evaluated by the Wolfsberg-Helmholtz equation<sup>2</sup>

$$\beta_\pi = KS_{p,q}(\alpha_{p,p} + \alpha_{q,q}) \quad (6b)$$

where  $K$  is taken to be 0.460 and  $S_{p,q}$  denotes the overlap integral between atoms  $p$  and  $q$ , the value of  $S_{p,q}$  is expressed by an exponential function of the distance  $(r_{p,q})$  and the effective nuclear charge  $(z_r)$ <sup>1</sup>

$$S_{p,q} = \exp[(-0.1112r_{p,q} + 0.1339)z_p z_q + (0.0449r_{p,q} - 0.3759)(z_p + z_q) - 0.8627r_{p,q} + 2.0631] \quad (6c)$$

and  $\beta_\sigma$  is evaluated by semiempirical equation

$$\beta_\sigma = \exp(-\varepsilon_\sigma / 2)(-3.546 \times 10^2 \varepsilon_\sigma^4 - 1.418 \times 10^3 \varepsilon_\sigma^3 + 4.255 \times 10^3 \varepsilon_\sigma^2 + 4.255 \times 10^4 \varepsilon_\sigma + 8.512 \times 10^4) \text{ cm}^{-1} \quad (6d)$$

with  $\varepsilon_\sigma = 5.385 r_{p,q} / \text{\AA}$ . The  $\beta_\sigma$  is the resonance integral for two end-on  $p_z$  orbitals ( $z=z'$ ) which was obtained by fitting observation properties of excimers.<sup>3</sup>

For the electron-electron repulsion integral,  $\gamma_{p,p}$ , we used the semiempirical expression<sup>1</sup> and  $\gamma_{p,q}$  can be evaluated by Mataga-Nishimoto equation<sup>4</sup>

$$\gamma_{p,p} = \exp(0.154z_p + 0.250\rho_p + 1.662) \quad (7a)$$

$$\gamma_{p,q} = e^2 / (r_{p,q} + \eta_{p,q}) \quad (7b)$$

where  $r_{p,q}$  is the distance between atom  $p$  and  $q$  and

$$\eta_{p,p} = e^2 / \gamma_{p,p} \quad (7c)$$

$$\eta_{p,q} = 2\eta_{p,p}\eta_{q,q} / (\eta_{p,p} + \eta_{q,q}) \quad (7d)$$

The excited-state wave functions of the fragments are expressed as the linear

combination of the singlet configuration functions corresponding to an excitation from SCF orbital  $n_1$  to  $n_2$  ( $^1\psi_N = ^1\psi_{n_1-n_2}$ ),

$$\Psi_i = \sum_N \xi_{i,N} ^1\psi_N. \quad (8)$$

The configuration interaction coefficients,  $\xi_{i,N}$ , and the excitation energy,  $\Delta E_i$ , are obtained by solving the following equation

$$\mathbf{A}\xi_i = \Delta E_i \xi_i, \quad (9a)$$

where the matrix elements of  $\mathbf{A}$  are given by

$$\mathbf{A}_{N,N} = \langle \psi_N | \mathbf{H} | \psi_N \rangle - \langle \psi_o | \mathbf{H} | \psi_o \rangle = E_{nr} - E_{na} - \langle n_a n_r | n_a n_r \rangle + 2 \langle n_a n_r | n_r n_a \rangle \quad (9b)$$

$$\mathbf{A}_{N,M} = \langle \psi_N | \mathbf{H} | \psi_M \rangle = 2 \langle m_a n_r | m_r n_a \rangle - \langle m_a n_r | n_a m_r \rangle \quad (9c)$$

$$\langle \mu\nu | \lambda\sigma \rangle = \iint \phi_\mu(1)\phi_\nu(2)(1/r_{12})\phi_\lambda(1)\phi_\sigma(2)d\tau_1 d\tau_2 \approx \sum_{p,q} C_{\mu,q} C_{\nu,p} C_{\lambda,q} C_{\sigma,p} \gamma_{q,p} \quad (9d)$$

(1) Hida, M. *Dyes and Pigments*. **1995**, 28, 217.

(2) Wolfsberg-Helmholtz equation

(3) (a) Warshel, A.; Huler, A. *Chem. Phys.* **1974**, 6, 463. (b) Warshel, A.; Shakked, Z. *J. Am. Chem. Soc.* **1975**, 97, 5679.

(4) Mataga, N.; Nishimoto, K. *Z. Phys. Chem.* **1957**, 13, 140.

Complete Ref. 31: Cornil, J.; Vanderdonckt, S.; Lazzaroni, R.; dos Santos, D. A.;

Thys, G.; Geise, H. J.; Yu, L.-M.; Szablewski, M.; Bloor, D.; Lögdlund, M.; Salaneck,

W. R.; Gruhn, N. E.; Lichtenberger, D. L.; Lee, P. A.; Armstrong, N. R.; Brédas, J. L.

*Chem. Mater.* **1999**, 11, 2436-2443.

**Table S1** Matrix Elements (in unit eV) of the Molecule **4** with or without (underline)

Double-Bonded Tethers

| entry    | F    | C    | V    | U     | t <sub>e</sub> | t <sub>h</sub> | CT%  |
|----------|------|------|------|-------|----------------|----------------|------|
| 6        | 3.41 | 4.47 | 0.16 | -0.03 | -0.15          | 0.06           | 2.51 |
| <u>6</u> | 3.53 | 4.75 | 0.11 | -0.01 | -0.03          | 0.08           | 0.74 |
| 7        | 3.43 | 4.45 | 0.15 | -0.02 | -0.18          | 0.10           | 4.87 |
| <u>7</u> | 3.56 | 4.79 | 0.11 | -0.01 | -0.03          | 0.07           | 0.46 |
| 8        | 3.09 | 4.56 | 0.19 | -0.19 | -0.18          | 0.17           | 3.12 |
| <u>8</u> | 3.24 | 4.85 | 0.11 | -0.08 | -0.04          | 0.11           | 0.65 |
| 9        | 3.12 | 4.58 | 0.20 | -0.19 | -0.20          | 0.22           | 4.52 |
| <u>9</u> | 3.29 | 4.92 | 0.10 | -0.05 | -0.03          | 0.08           | 0.36 |
